# Supplementary figures and images for: Electrical impedance spectroscopy – a potential method for the study and monitoring of a bone critical-size defect healing process treated with bone tissue engineering and regenerative medicine approaches
Source: Royal Society of Chemistry journal article supplement (doi:10.1039/c5tb02707a), 2016-01-01

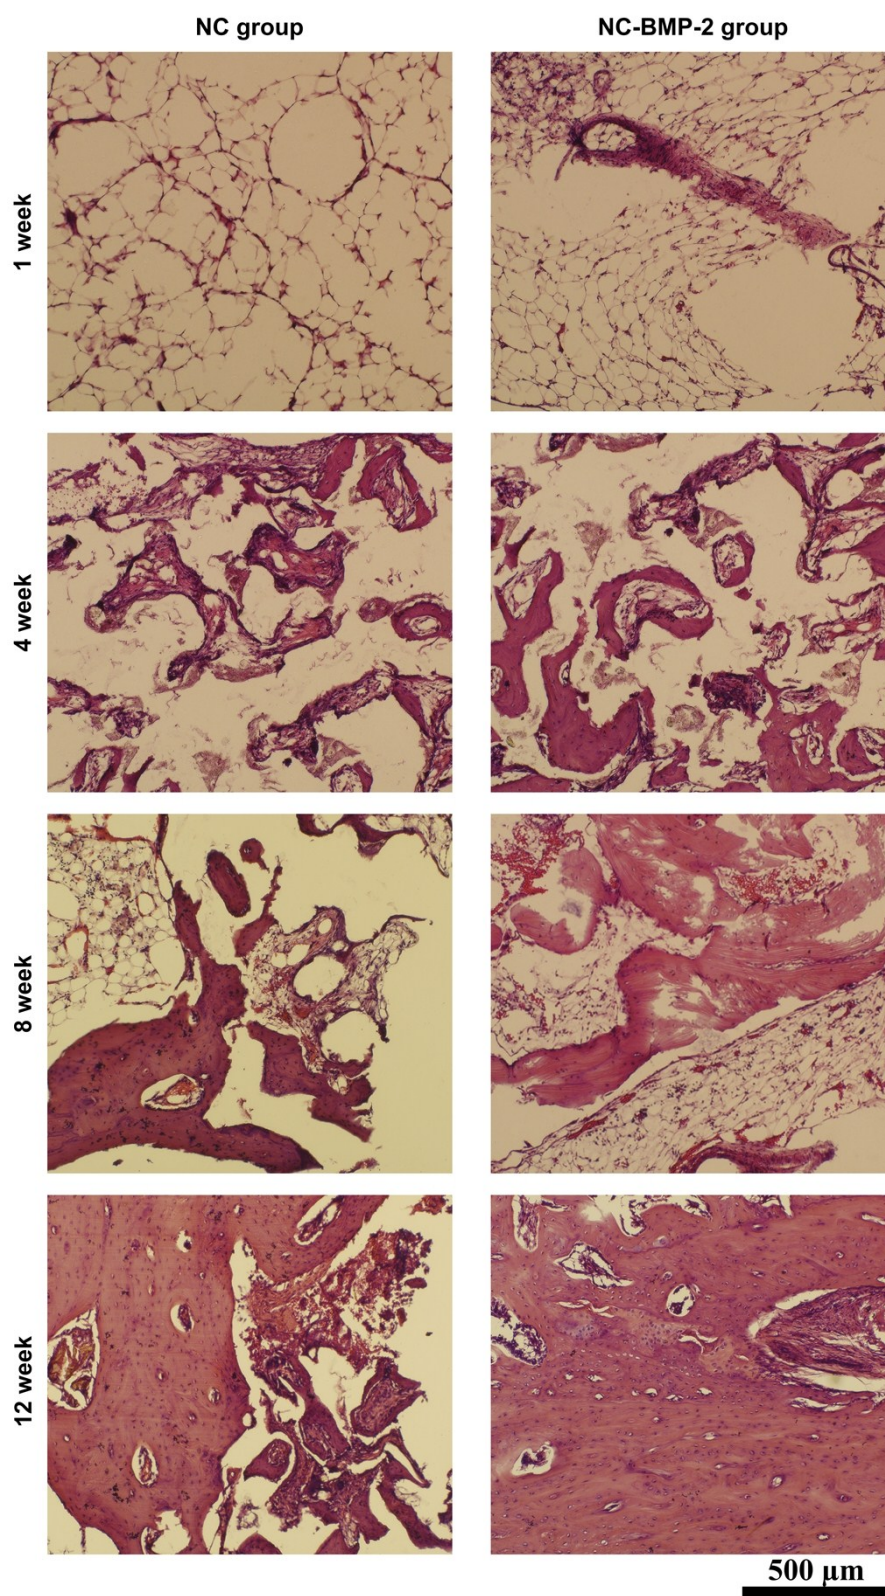

Fig. 1. H&E images at 1, 4, 8, and 12 week for NC and NC-BMP-2 groups.

Supplement: c5tb02707a1.pdf [file c5tb02707a1.pdf]
